# Supplementary material for: Maternal Satisfaction and Its Associated Factors towards Spinal Anesthesia for Caesarean Section: A Cross-Sectional Study in Two Eritrean Hospitals
Source: Hindawi journal article supplement (doi:10.1155/2020/5025309), 2020-03-21
Supplement: f1 [file 5025309.f1.pdf]

## Questionnaire Form

Data collection format prepared for maternal satisfaction and its associated factors towards spinal anesthesia for cesarean section.

| NO. | A. Demographic status of the patient                       |                                                                                          | Skip to  |
|-----|------------------------------------------------------------|------------------------------------------------------------------------------------------|----------|
| 1   | Hospital                                                   | Sembel.....1<br>Orotta Maternity..... 2                                                  |          |
| 2   | Age (years)                                                |                                                                                          |          |
| 3   | Level of Education                                         | Illiterate.....0<br>Primary .....1<br>Junior .....2<br>Secondary.....3<br>Tertiary.....4 |          |
| 4   | Employment                                                 | Employed .....1<br>Unemployed .....2                                                     |          |
| 5   | Marital status                                             | Married .....1<br>Single .....2                                                          |          |
|     | <b>B. Parturition history</b>                              |                                                                                          |          |
| 6   | Parity                                                     | Primipara.....1<br>Multipara.....2                                                       |          |
| 7   | Neonate birth weight                                       | <3kg .....1<br>>3kg .....2                                                               |          |
| 8   | APGAR Score in 10 min                                      | 10 .....1<br><10 .....2                                                                  |          |
|     | <b>C. Past medical, surgical and anesthetic experience</b> |                                                                                          |          |
| 9   | Does patient have any medical history?                     | Yes.....1<br>No .....2                                                                   |          |
| 10  | Has patient received anesthesia before?                    | Yes .....1<br>No .....2                                                                  | -----→12 |
| 11  | What technique?                                            | GA .....1<br>SA .....2                                                                   |          |

|                              |                                                                 |                                                                                                                    |          |
|------------------------------|-----------------------------------------------------------------|--------------------------------------------------------------------------------------------------------------------|----------|
| 12                           | Had patient complication from receiving anesthesia before?      | Yes.....1<br>No.....2                                                                                              | -----→14 |
| 13                           | What was the complication?                                      | PONV.....1<br>Urinary retention...2<br>Pain.....3<br>Backache.....4<br>Others.....5<br>(specify):_____             |          |
| <b>D. Perioperative care</b> |                                                                 |                                                                                                                    |          |
| 14                           | Did you have intra operative pain?                              | Yes.....1<br>No .....2                                                                                             |          |
| 15                           | Did you have post-operative backache?                           | Yes.....1<br>No.....2                                                                                              |          |
| 16                           | Did you have PONV?                                              | Yes .....1<br>No .....2                                                                                            |          |
| 17                           | Number of Attempts at puncture site?                            | ≤2 trials.....1<br>>2trials.....2                                                                                  |          |
| 18                           | Are you happy to take spinal anesthesia for same procedure C/S? | Yes.....1<br>No.....2                                                                                              | -----→20 |
| 19                           | If answer to No. 18 is No why?                                  | Fear of awareness.....1<br>Pain .....2<br>Nausea&vomiting.....3<br>PDPH ..... 4<br>Others.....5<br>(specify):_____ |          |

## 20. Satisfaction questions

|     |                                                                                                      | 1 | 2 | 3 |
|-----|------------------------------------------------------------------------------------------------------|---|---|---|
| No. | <b>Preoperative Assessment and Evaluation</b>                                                        |   |   |   |
| 1   | Satisfaction with the amount of information given from the anesthesia practitioners about anesthesia |   |   |   |

|     |                                                                                  |  |  |  |
|-----|----------------------------------------------------------------------------------|--|--|--|
| 2   | Explanation about operation                                                      |  |  |  |
| 3   | Explanation about your stay at OR                                                |  |  |  |
| 4   | Understandable information                                                       |  |  |  |
| 5   | Sufficient explanation about the feeling after anesthesia                        |  |  |  |
| 6   | Satisfaction with preoperative visit                                             |  |  |  |
| 7   | Satisfaction with information about postoperative complication                   |  |  |  |
| No. | <b>Pain Therapy</b>                                                              |  |  |  |
| 8   | Satisfaction with postoperative pain                                             |  |  |  |
| 9   | How you satisfied with the absence of pain at puncture site                      |  |  |  |
| 10  | Satisfaction with absence of pain during operation                               |  |  |  |
| No. | <b>Attention by the Anesthetist</b>                                              |  |  |  |
| 11  | Satisfaction of anaesthetist's attention to your complaints like pain and nausea |  |  |  |
| 12  | Satisfaction with degree of anaesthetist's will to listen your questions         |  |  |  |
| 13  | Action according to your needs                                                   |  |  |  |
| 14  | Anesthetist show understanding for your situation                                |  |  |  |
| No. | <b>Anesthetist –patient relationship</b>                                         |  |  |  |
| 15  | Did the anesthetist take into account your privacy?                              |  |  |  |
| 16  | Anesthetist's respect/politeness                                                 |  |  |  |
| 17  | Anesthetist account on your cultural background?                                 |  |  |  |
| 18  | Satisfaction with the chance for your decision on type of anesthesia received    |  |  |  |
| No. | <b>Postoperative care</b>                                                        |  |  |  |
| 19  | Satisfaction with anaesthetists postop visit                                     |  |  |  |
| 20  | Satisfaction with PONV treatment                                                 |  |  |  |
| No. | <b>Quality care</b>                                                              |  |  |  |
| 21  | Satisfaction with waiting time between your arrival at theatre and operation     |  |  |  |
| 22  | Satisfaction to receive same anesthetic again                                    |  |  |  |
| 23  | Degree of your confidence in the anesthesia practitioners                        |  |  |  |
| 24  | Degree you find your anesthesia practitioners professional                       |  |  |  |
| 25  | Recommendation of the anesthesia team to others in your family                   |  |  |  |

Key: 1= dissatisfied 2 = Neutral 3 = Satisfied
